# Supplementary material
Source: PubMed Central journal article supplement (PMC2546535)
Supplement: M803894200_1.pdf [file M803894200_1.pdf]

**Multiple Membrane-Cytoplasmic Domain Contacts in CFTR Mediate Regulation of Channel Gating**

He/Aleksandrov/Serohijos/Hegedus/Aleksandrov/Cui/Dokholyan/Riordan

1. Supplemental figure legends
2. Supplemental Fig. 1
3. Supplemental Fig. 2
4. Supplemental Fig. 3

**Supplemental Figure Legends**

**Supplement Fig. 1 CL3-NBD2 interface. A).** Membrane vesicles were prepared from HEK cells transiently transfected with Cys-less CFTR plus Cys pair M961C/L1260C or S962C/L1261C. Control or PKA treated membrane vesicles were incubated with 20  $\mu$ M M8M and proteins were resolved with 7.5% SDS-PAGE and detected with CFTR mAb 596. \* denotes the faster moving band of cross-linked CFTR. PKA phosphorylation of CFTR did not affect cross-linking. **B&C).** Confirmation of CL3 and NBD2 interface with co-expressed  $\Delta$ NBD2 and NBD2. HEK cells were transiently co-transfected with a Cys-less  $\Delta$ NBD2 construct with M961C and a Cys-less NBD2 construct with L1261C. Cross-linking was carried out using the same protocol described in Fig. 2 legend, and the N-half and C-half fragments of CFTR were detected using mAb 450 (B) and mAb 596 (C), respectively. B': immature core glycosylated  $\Delta$ NBD2-CFTR; C': mature complex glycosylated  $\Delta$ NBD2-CFTR; X': cross-linked  $\Delta$ NBD2-CFTR and NBD2 fragment.

**Supplement Fig. 2 Interface between CL1 and NBD1 at RI. A).** HEK 293 cells transiently transfected with Cys-less CFTR with Cys pairs introduced at V171 of CL1 and E407 or L408 of the RI of NBD1 were incubated with MTS reagents and cross-linking was carried out as described in Fig. 2 legend. No cross-linked band was detected. **B).** Membrane vesicles were prepared from stable BHK cells with Cys-less CFTR plus Cys pair V171C/E407C or V171C/L408C. Control or PKA treated membrane vesicles were incubated with 20  $\mu$ M M8M before subjecting to limited trypsin digestion as described in Fig. 3 legend. Partially digested fragments were resolved with 4-20% SDS-PAGE and Western blotting with CFTR mAb 13-4. The band highlighted in the rectangle is shown at the bottom. \* denotes the cross-linked fragment that moved faster than its uncross-linked counterpart. **C).** Membrane vesicles were prepared from stable BHK cells with a Cys pair introduced at Q958 and L1261. After incubation with 20  $\mu$ M M8M, membranes were subjected to limited trypsin digestion with concentrations indicated in the figure. Digested CFTR fragments were detected as described in B). No cross-linking was detected as predicted by the model.

**Supplement Fig. 3 Negative cross-linking controls.** Cross-linking was performed on transiently transfected HEK cells as described in Fig. 2 figure legend. Cys pairs that do not associate according to the structural model were introduced in Cys-less CFTR at different CLs and NBDs. **A).** L172C/E543C at CL1/NBD1; **B).** T966C/D1341C (CL3/NBD2); **C).** V171C/L1261C (CL1/NBD2); and **D).** M961C/L408C (CL3/NBD1). No cross-linking was detected.

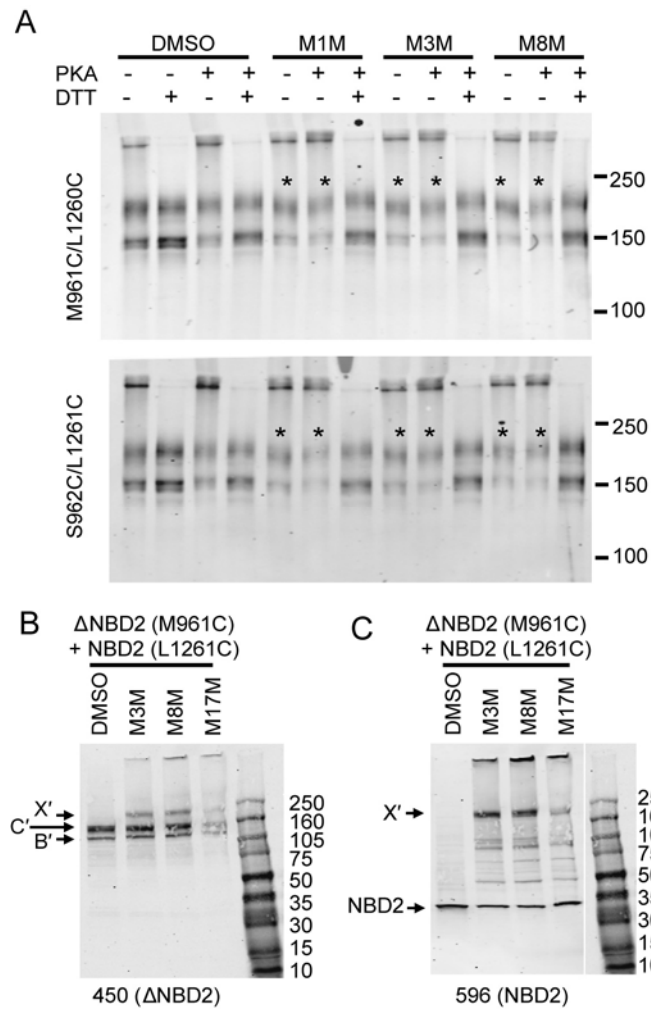

**Supplementary Figure 1**  
He L, et al.

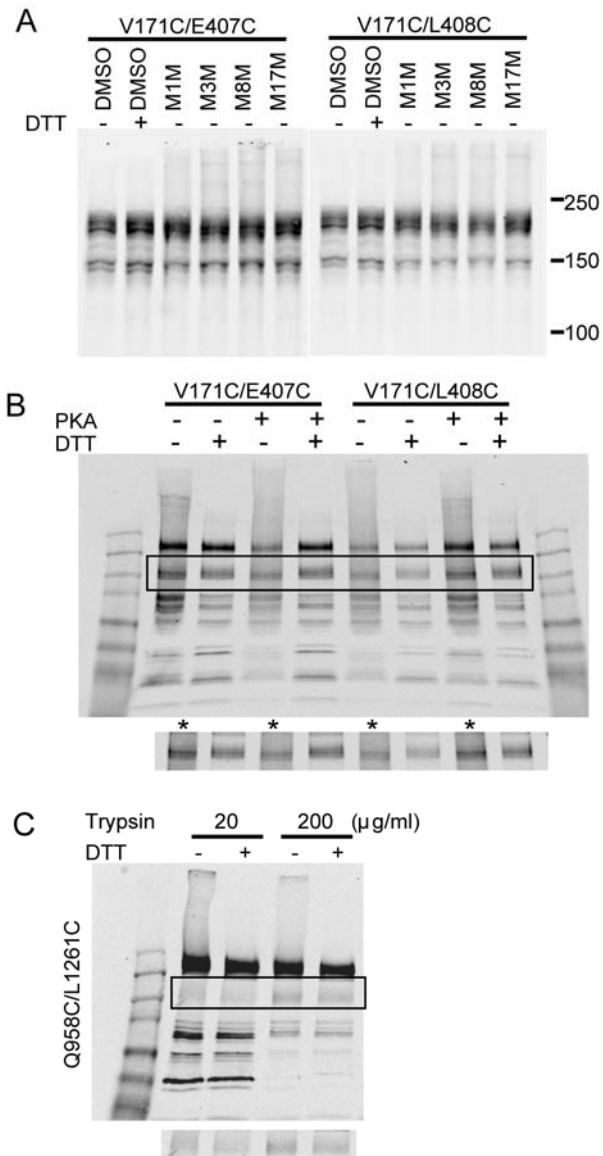

**Supplementary Figure 2**  
He L, et al.

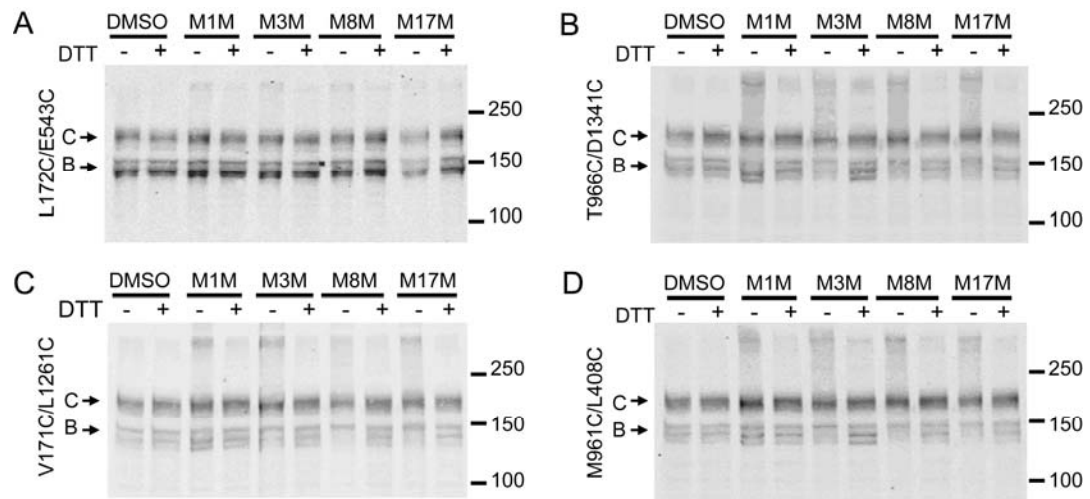

**Supplementary Figure 3**

He L, et al.
